# Supplementary material
Source: publisher site journal article supplement (https://www.dovepress.com/article/434720)
Supplement: Supplementary file 1 [file get_supplementary_file.php]

## **Supplementary Material**

**Figure S1. ROC curve for European Society of Cardiology (ESC) / European Respiratory Society (ERS) Risk Score and ESC/ERS Risk Score + SIRS in predicting clinical worsening.** SIRS, Systemic inflammatory response index; ROC, receiver operator characteristic.

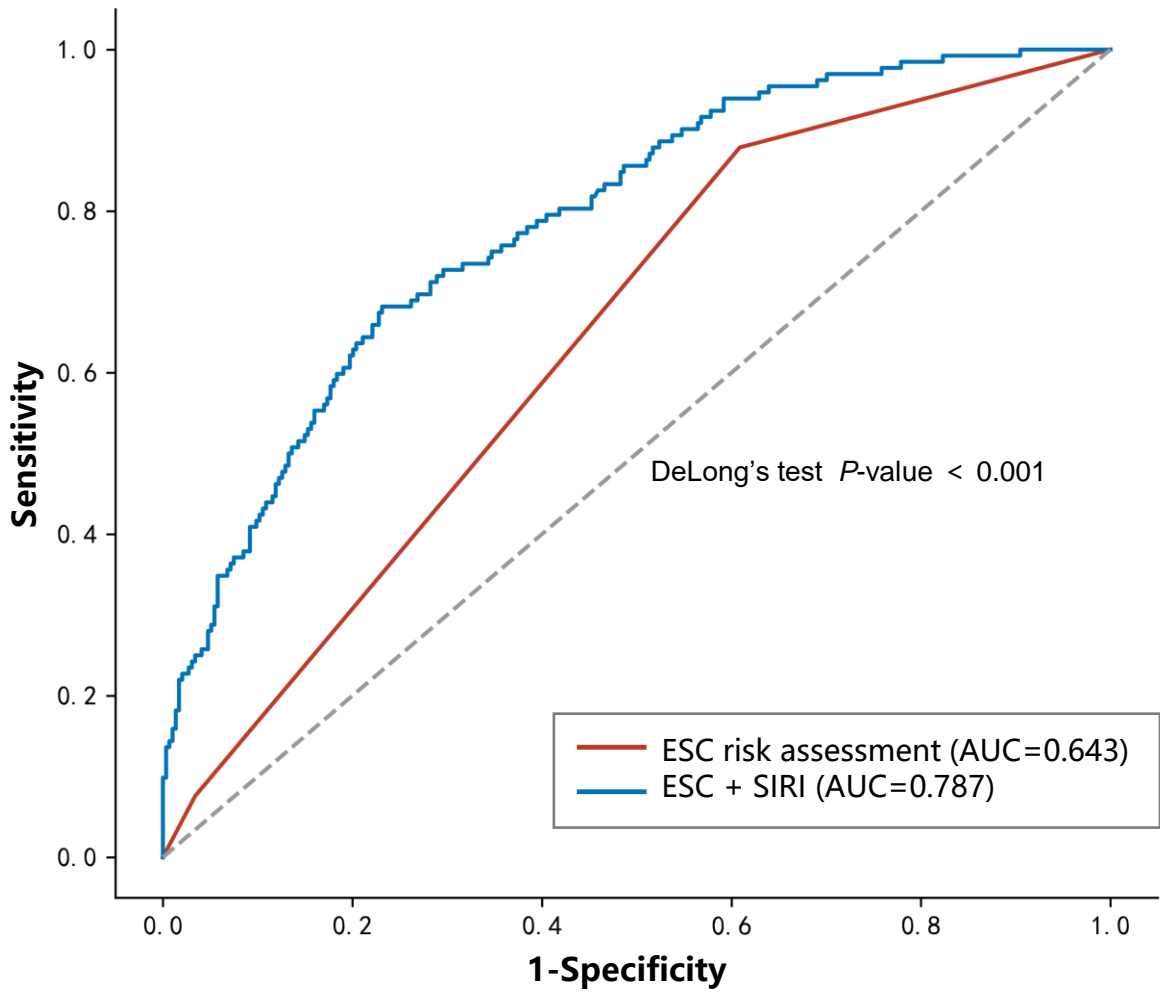

**Table S1. Variables and cut-off values used for abbreviated European Society of Cardiology (ESC)/European Respiratory Society (ERS) risk score.**

| Points assigned                     | 1           | 2                  | 3             |
|-------------------------------------|-------------|--------------------|---------------|
| WHO function class                  | I/II        | III                | IV            |
| 6 MWD, m                            | >440        | 165-440            | <165          |
| BNP, ng/L<br>or NT-proBNP, ng/L     | <50<br><300 | 50-300<br>300-1400 | >300<br>>1400 |
| Right atrial pressure, mmHg         | <8          | 8-14               | >14           |
| Cardiac index, L/min/m <sup>2</sup> | ≥2.5        | 2.0-2.4            | <2.0          |
| SvO <sub>2</sub> , %                | >65         | 60-65              | <60           |

The ESC/ERS risk stratification strategy was used to categorize patients as low, intermediate or high risk. All patients had at least three of the six listed variables available. Briefly, the cut-off values proposed in the guidelines were graded from 1 (low risk), 2 (intermediate risk) and 3 (high risk). For each patient, the sum of all grades was divided by the number of available variables and rounded to the next integer to define the risk group.

WHO, World Health Organization; 6 MWD, 6-minute walk distance; BNP: brain natriuretic peptide; NT-proBNP, N-terminal pro-brain natriuretic peptide; SvO<sub>2</sub>: mixed venous oxygen saturation.

**Table S2. Baseline variables in groups with high or low levels of SIRI.**

| Variables              | SIRI ≤ 0.714<br>(n = 241) | SIRI > 0.714<br>(n = 185) | P-value |
|------------------------|---------------------------|---------------------------|---------|
| Age, years             | 30.0 [26.0-38.0]          | 33.0 [26.0-39.0]          | 0.395   |
| Female, n (%)          | 203 (84.2)                | 127 (68.6)                | <0.001* |
| BMI, kg/m <sup>2</sup> | 22.6 [20.7-24.8]          | 22.4 [19.9-25.4]          | 0.603   |
| WHO-FC, n (%)          |                           |                           | 0.315   |

|                                          |                   |                    |         |
|------------------------------------------|-------------------|--------------------|---------|
| I or II                                  | 138 (57.3)        | 96 (51.9)          |         |
| III or IV                                | 103 (42.7)        | 89 (48.1)          |         |
| 6 MWD, m                                 | 426 [372-472]     | 414 [367-451]      | 0.101   |
| Smoking, n (%)                           | 21 (8.7)          | 25 (13.5)          | 0.154   |
| Alcohol intake, n (%)                    | 14 (5.8)          | 15 (8.1)           | 0.459   |
| Diabetes mellitus, n (%)                 | 5 (2.1)           | 7 (3.8)            | 0.446   |
| Hypertension, n (%)                      | 26 (10.8)         | 18 (9.7)           | 0.845   |
| PH specific medication, n (%)            | 200 (83.0)        | 149 (80.5)         | 0.601   |
| <b>Laboratory data</b>                   |                   |                    |         |
| NT-proBNP, pg/mL                         | 945 [352-1873]    | 1202 [456-2166]    | 0.084   |
| White blood cell, 10 <sup>9</sup> /L     | 6.0 [5.1-7.5]     | 8.0 [6.8-9.0]      | <0.001* |
| Neutrophil, 10 <sup>9</sup> /L           | 3.3 [2.7-4.2]     | 5.2 [4.4-6.3]      | <0.001* |
| Lymphocyte, 10 <sup>9</sup> /L           | 2.3 [1.8-2.8]     | 2.0 [1.6-2.4]      | <0.001* |
| Monocyte, 10 <sup>9</sup> /L             | 0.3 [0.3-0.4]     | 0.5 [0.4-0.6]      | <0.001* |
| Hemoglobin, g/L                          | 152 [135-166]     | 157 [142-171]      | 0.036*  |
| Platelets, 10 <sup>9</sup> /L            | 193 [156-250]     | 208 [168-248]      | 0.087   |
| Albumin, g/L                             | 43.8 ± 5.2        | 43.5 ± 5.8         | 0.586   |
| ALT, IU/L                                | 25.0 [16.0-37.0]  | 23.0 [16.0-36.0]   | 0.859   |
| AST, IU/L                                | 26.0 [21.0-34.0]  | 25.0 [20.0-36.0]   | 0.688   |
| Triglyceride, mmol/L                     | 1.2 [0.9-1.7]     | 1.2 [0.9-1.8]      | 0.754   |
| Cholesterol, mmol/L                      | 4.2 ± 0.9         | 4.1 ± 1.0          | 0.398   |
| Serum creatinine, umol/L                 | 71.1 [61.7-80.6]  | 74.4 [63.1-84.3]   | 0.022*  |
| Blood urea nitrogen, mmol/L              | 5.1 [4.2-6.4]     | 5.5 [4.5-6.5]      | 0.043*  |
| <b>Inflammatory Hematological Ratios</b> |                   |                    |         |
| SII                                      | 293 [215-388]     | 549 [401-739]      | <0.001* |
| NLR                                      | 1.50 [1.23-1.85]  | 2.65 [2.17-3.26]   | <0.001* |
| PLR                                      | 87.3 [68.0-112.0] | 103.0 [79.0-138.0] | <0.001* |
| <b>Echocardiography</b>                  |                   |                    |         |

|                                   |                  |                  |        |
|-----------------------------------|------------------|------------------|--------|
| Pericardial effusion, n (%)       | 36 (14.9)        | 38 (20.5)        | 0.166  |
| LA, mm                            | 29.0 [27.0-32.0] | 30.0 [27.0-32.0] | 0.439  |
| LVED, mm                          | 36.0 [32.0-40.0] | 36.0 [32.0-40.0] | 0.233  |
| LVEF, mm                          | 65.0 [60.0-68.5] | 64.0 [60.0-69.1] | 0.434  |
| RVED, mm                          | 32.0 [28.0-36.8] | 34.0 [29.0-40.0] | 0.013* |
| TRV, m/s                          | 4.4 [4.0-4.8]    | 4.5 [4.1-4.9]    | 0.133  |
| sPAP, mmHg                        | 88.7 ± 21.8      | 91.7 ± 23.4      | 0.171  |
| <b>Hemodynamics</b>               |                  |                  |        |
| S <sub>v</sub> O <sub>2</sub> , % | 68.6 [64.0-72.8] | 68.4 [63.9-72.7] | 0.691  |
| mRAP, mmHg                        | 5.0 [2.0-7.0]    | 4.0 [2.0-7.0]    | 0.883  |
| mPAP, mmHg                        | 53.0 [45.0-62.0] | 57.0 [49.0-70.0] | 0.001* |
| PAWP, mmHg                        | 7.0 [5.0-9.0]    | 7.0 [5.0-9.0]    | 0.959  |
| CI, L/min/m <sup>2</sup>          | 2.8 [2.3-3.4]    | 2.7 [2.2-3.2]    | 0.313  |
| PVR, wood units                   | 11.7 [8.4-14.7]  | 13.0 [9.2-17.1]  | 0.004* |

ALT, Alanine aminotransferase; AST, Aspartate aminotransferase; BMI, Body mass index; CI, Cardiac index; LA, Left atrium dimension; LVED, Left ventricular end-diastolic diameter; LVEF, Left ventricular ejection fraction; mPAP, Mean pulmonary arterial pressure; mRAP, Mean right atrial pressure; NLR, neutrophil-to-lymphocyte ratio; NT-proBNP, N-terminal pro-brain natriuretic peptide; PAWP, Pulmonary arterial wedge pressure; PH, Pulmonary hypertension; PLR, platelet-to-lymphocyte ratio; PVR, Pulmonary vascular resistance; RVED, Right ventricular end-diastolic diameter; 6 MWD, 6-min walk distance; SII, systemic immune-inflammation index; SIRI, Systemic inflammatory response index; sPAP, Systolic pulmonary arterial pressure; S<sub>v</sub>O<sub>2</sub>, Mixed venous oxygen saturation; TRV, Tricuspid regurgitation velocity; WHO-FC, World Health Organization functional class.

Data are presented as mean ± standard deviation, median [25th–75th percentile] or number (percentage).

\* P < 0.05.

**Table S3. Sensitivity, specificity, positive predictive value (PPV), and negative predictive value (NPV) for SIRI, SII, PLR, and NLR.**

|      | Sensitivity | Specificity | PPV   | NPV   |
|------|-------------|-------------|-------|-------|
| SIRI | 0.735       | 0.701       | 0.524 | 0.855 |
| SII  | 0.500       | 0.724       | 0.449 | 0.763 |
| PLR  | 0.500       | 0.568       | 0.342 | 0.717 |
| NLR  | 0.697       | 0.626       | 0.455 | 0.821 |

NLR, neutrophil-to-lymphocyte ratio; PLR, platelet-to-lymphocyte ratio; SII, systemic immune-inflammation index; SIRI, Systemic inflammatory response index;
